# Supplementary material for: MAPK1E322K mutation increases head and neck squamous cell carcinoma sensitivity to erlotinib through enhanced secretion of amphiregulin
Source: PubMed Central journal article supplement (PMC5029627; doi:10.18632/oncotarget.8188), 2016-03-18
Supplement: oncotarget-07-23300-s001.pdf [file oncotarget-07-23300-s001.pdf]

**MAPK1<sup>E322K</sup> mutation increases head and neck squamous cell carcinoma sensitivity to erlotinib through enhanced secretion of amphiregulin**

**Supplemental Materials**

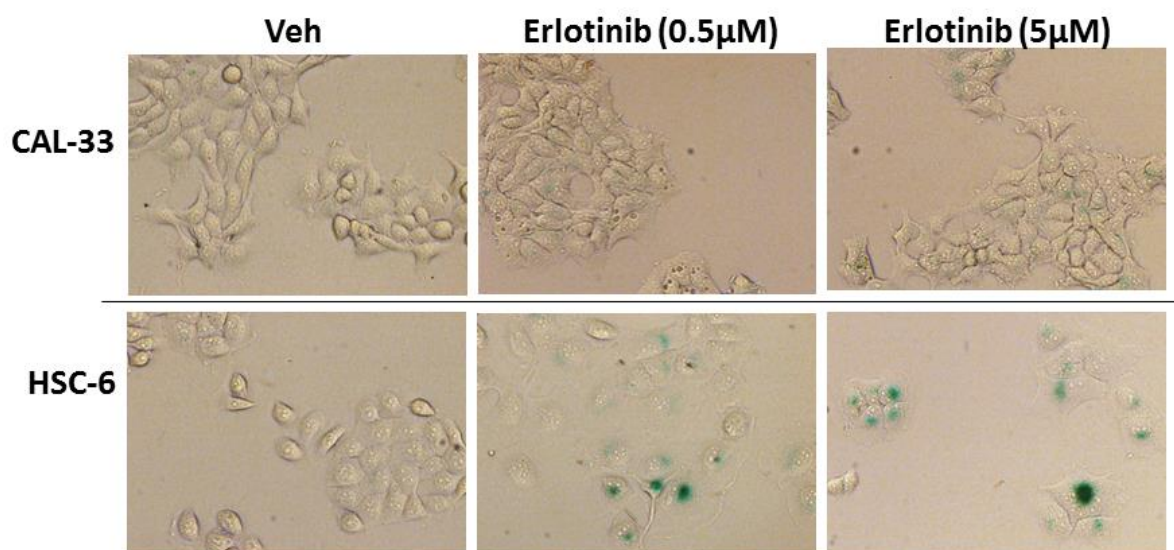

**Figure S1. Representative pictures of enhanced senescence in HSC-6 cells compared with CAL33 following erlotinib treatment.** Senescence staining of CAL-33 (*MAPK1* WT) and HSC-6 (*MAPK1* E322K) was performed following 48 h erlotinib treatment.  $\beta$ -galactosidase activity at pH 6 was detected in senescent cells by light microscopy (100x) following staining using the senescence staining kit (Cell Signaling Technology, USA).

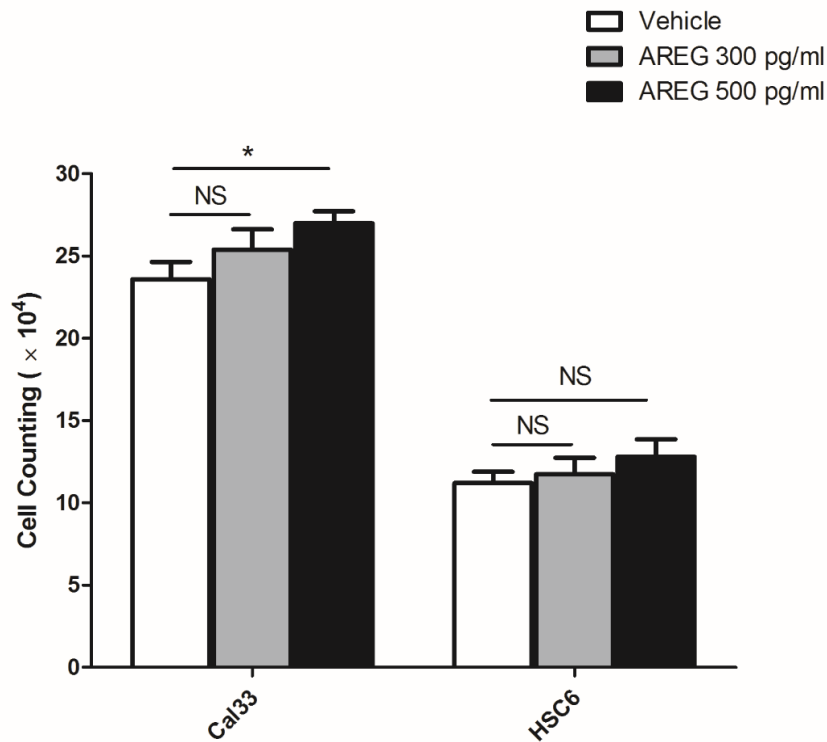

**Figure S2. AREG at 300 pg/ml did not significantly increase cell growth of HNSCC cell lines.** The effect of AREG supplementation on HNSCC cell viability were determined by trypan blue exclusion assay. Briefly, exponentially growing cells were seeded into 12-well plates at a cell density of  $2.5 \times 10^4$  cells/well in complete medium, cultured overnight and treated with DMSO vehicle or AREG at indicated concentrations for 48 hours. NS: no significance; \*  $p < 0.05$

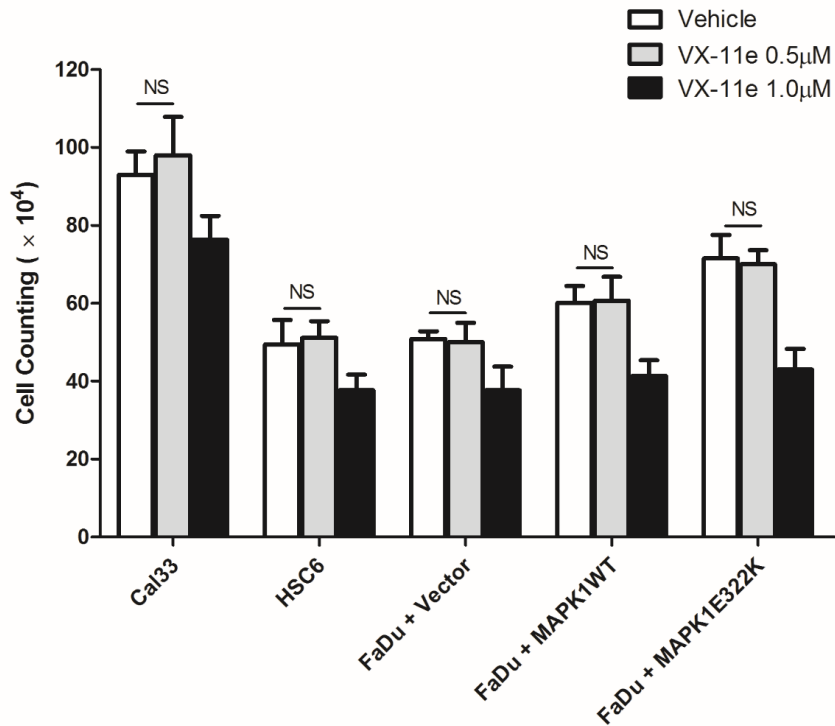

**Figure S3. Dose response of VX-11e indicates 0.5μM dose did not reduce cell viability.** The effects of VX-11e on HNSCC cell lines viability were determined by trypan blue exclusion assay. Briefly, exponentially growing cells were seeded into 6-well plates at a cell density of  $2.5 \times 10^5$  cells/well in complete medium, cultured overnight and treated with DMSO vehicle or VX-11e at indicated concentrations for 24 hours. NS: no significance.

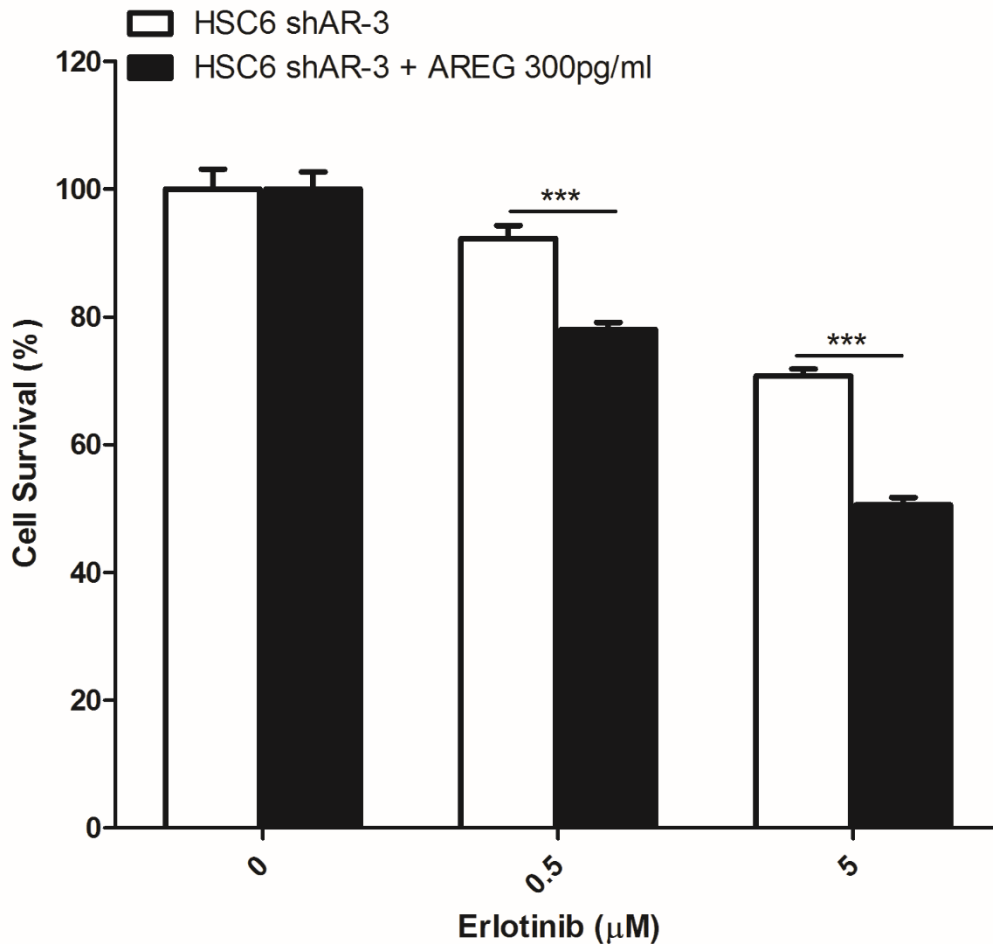

**Figure S4. Exogenous AREG restores erlotinib sensitivity in *MAPK1*<sup>E322K</sup> cells with depletion of AREG by shRNA.** HSC-6 cells expressing shAR-3 were treated with erlotinib at the indicated concentrations for 48 hours. Cell survival was measured by crystal violet dye extraction growth assay and plotted relative to DMSO vehicle control. (n=3, \*\*\*p<0.001). For exogenous AREG experiment, HSC-6 cells with shAR-3 knockdown were pretreated with AREG for 24 hours, then treated with combination of erlotinib (0, 0.5 or 5 μmol/l) and AREG for 48 hours. Cell survival was measured by crystal violet dye extraction growth assay and plotted relative to AREG control (n=3, \*\*\*p<0.001). Similar results were obtained in three independent experiments as well as other HSC-6 cell clones with shAREG knockdown.

**Table S1. EGFR Ligand levels in conditioned media from Cal33, HSC6 and FaDu engineered cells by quantitative ELISA**

| EGFR Ligands(pg/ml) | Cal33      | HSC6       | FaDu+<br>vector | FaDu+<br><i>MAPK1<sub>wt</sub></i> | FaDu+<br><i>MAPK1<sup>E322K</sup></i> |
|---------------------|------------|------------|-----------------|------------------------------------|---------------------------------------|
| AREG                | 399.7±13.4 | 568.8±15.6 | 282.8±6.4       | 298.8±12.3                         | 343.0±20.3                            |
| TGF- $\alpha$       | <7.1       | <7.1       | <7.1            | <7.1                               | <7.1                                  |
| EGF                 | <3.9       | <3.9       | <3.9            | <3.9                               | <3.9                                  |
| HB-EGF              | <20        | <20        | <20             | <20                                | <20                                   |

Threshold sensitivities for AREG, TGF- $\alpha$ , EGF and HB-EGF were 0.5 pg/ml, 7.1 pg/ml, 3.9 pg/ml and 20 pg/ml respectively.
